# Supplementary material for: Surfactant-free suspension polymerization of hydrophilic monomers with an oil-in-water system for the preparation of microparticles toward the selective isolation of tumor cells
Source: Royal Society of Chemistry journal article supplement (doi:10.1039/d2ma00129b), 2022-01-01
Supplement: d2ma00129b1.pdf [file d2ma00129b1.pdf]

## Supplementary Information

### **Surfactant Free Suspension Polymerization of Hydrophilic Monomers with Oil-in-Water System for Preparation of Microparticles toward Selective Isolation of Tumor Cells**

Shin-nosuke Nishimura,<sup>a</sup> Kei Nishida,<sup>a\*</sup> Shohei Shiimoto<sup>a</sup> and Masaru  
Tanaka<sup>a\*</sup>



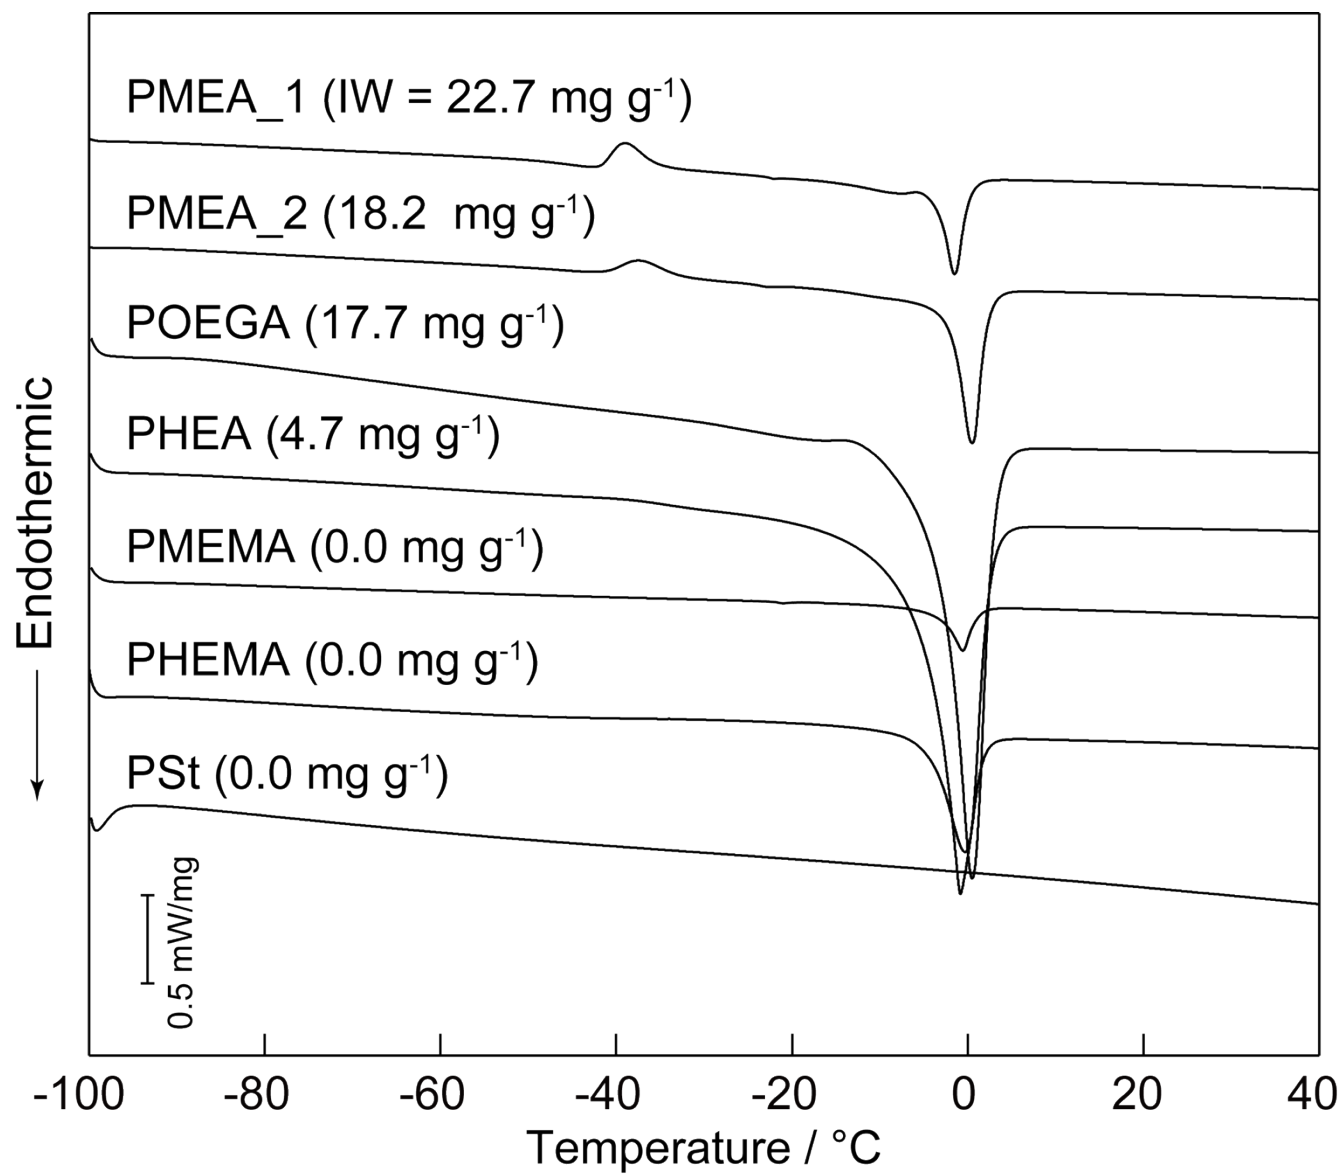

**Figure S2.** DSC thermograms of the polymers' microparticles. The measurements were carried out after sufficient soaking in PBS (-).

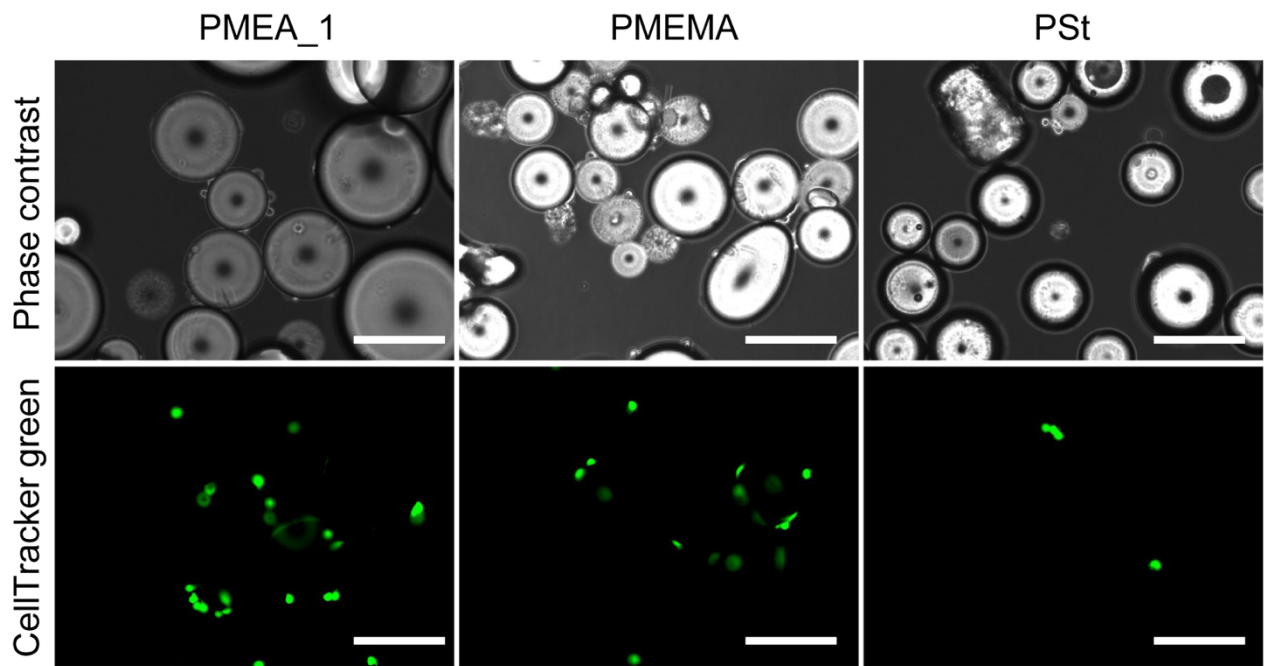

**Figure S3.** Phase contrast and fluorescence images of HeLa cells treated with PMEA\_1, PMEMA, and PSt microparticles for 24 h under static condition. HeLa cells were stained with CellTracker green before the treatment. Scale bar is 100  $\mu\text{m}$ .

**Table S1.** Summary of atom ratio for the microparticles prepared in this study.

| Samples | Atom ratio (%) <sup>a</sup> |                   |                    |                   |
|---------|-----------------------------|-------------------|--------------------|-------------------|
|         | C <sub>theo.</sub>          | C <sub>obs.</sub> | O <sub>theo.</sub> | O <sub>obs.</sub> |
| PMEA_1  | 66.7                        | 66.2              | 33.3               | 33.8              |
| PMEA_2  | 66.7                        | 65.9              | 33.3               | 34.1              |
| POEGA   | 66.7                        | 67.1              | 33.3               | 32.9              |
| PHEA    | 62.5                        | 62.2              | 37.5               | 37.8              |
| PMEMA   | 70.0                        | 69.3              | 30.0               | 30.7              |
| PHEMA   | 66.7                        | 66.8              | 33.3               | 33.2              |

a) The atom ratio was calculated by XPS measurement.
